# Supplementary material
Source: publisher site journal article supplement (https://www.dovepress.com/get_supplementary_file.php?f=473397.xlsx)
Supplement: Supplementary file 1 [file get_supplementary_file.php]

## Sheet: Sheet1
Trial	Type of Trial	No. patients	Nitrate	Nitrite	Exercise Performance and Symptoms	Vascular Function	Blood Pressure	Sleep	Dosage	Length(days)
Alshafie S, et al.(2021)44	Systematic review and Meta-analysis	-	↑	↑	-	-	-	-	-	-
Shepherd AI, et al.(2015)45	Double-blind, placebo-controlled, randomized study	13	↑	-	The consumption of beetroot juice did not result in significant enhancements in the walking distance during the 6MWT or the oxygen consumption during cycling exercise among patients with mild–moderate COPD.	-	The study found no significant decrease in blood pressure compared to the placebo group after two days of beetroot juice intervention.	-	6.77 mmol	2.5
Curtis KJ, et al.(2015)46	Double-blind, placebo-controlled, crossover single-dose study	21	↑	↑	Despite a reduction in isotime oxygen consumption following the intake of nitrate-rich beetroot juice, there was no improvement in the endurance exercise duration for stable patients with COPD.	-	Beetroot juice significantly lowered the resting diastolic blood pressure in patients with COPD, although a further reduction in mean arterial pressure was noted, it did not reach statistical significance.	-	12.9 mmol	-
Kerley CP, et al.(2019)47	Double-blind, randomized, placebo-controlled, crossover trial	8	↑	↑	-	-	Beetroot juice intervention did not improve the blood pressure in patients with COPD	-	12.9 mmol	14
Berry MJ, et al.(2015)49	Single-blind, placebo-controlled, crossover study	15	↑	↑	Acute intake of beetroot juice could prolong the time-to-exhaustion during submaximal constant work rate exercise in patients with COPD without increasing their oxygen consumption. However, the study found no significant difference in dynamic lung hyperinflation, dyspnea, and leg discomfort scores between beetroot juice and placebo, either isotime or at the end of exercise.	-	-	-	-	-
Beijers RJHCG, et al.(2018)50	Double-blind, randomized, crossover, placebo-controlled trial	20	↑	↑	-	-	-	-	⁓8 mmol	7
Wisor JP, et al.(2021)51	Double-blind, counterbalanced design	15	↑	None	-	-	-	The results showed that beetroot juice reduced the frequency of direct awakenings to non-rapid eye movement (NREM) sleep transitions and awakenings to moderate-depth N2 sleep transitions, and increased the frequency of transitions from NREM sleep to rapid eye movement (REM) sleep.	⁓6.2 mmol	-
Pavitt MJ, et al.(2022)52	Double-blind, randomized crossover study	20	↑	↑	Beetroot juice could enhance the exercise capacity of hypoxic patients with COPD.	Beetroot juice improved vascular function.	The study showed no statistical difference in any blood pressure changes.	-	12.9 mmol	-
Friis AL, et al.(2017)19	Randomized, double-blinded, PL-controlled, crossover study	15	-	↑	Beetroot juice did not enhance the exercise capacity of patients with moderate-severe COPD (FEV1<80% of predicted), nor was there a significant reduction observed in oxygen consumption.	-	Beetroot juice significantly reduced diastolic blood pressure in patients with COPD but had no effect on systolic pressure.	-	600mg	7
Alasmari AM, et al.(2024)53	Prospective, double-blind, parallel group, randomised, placebo-controlled trial	70	↑	↑	The results showed improvement in the 6MWT distance in the active treatment group, but no significant improvements were observed in the CAT score and MRC dyspnea score.	Compared to placebo, 12 weeks of dietary nitrate intake in the form of beetroot juice was associated with improvements in endothelial RHI scores and AIx75, without leading to any changes related to platelet aggregation.	Beetroot juice significantly reduced systolic and mean arterial pressures, with no statistically significant effect on diastolic pressure.	-	400mg	84
Pavitt MJ, et al.(2020)58	Multicenter, double-blind, placebo-controlled, randomized parallel-group study	112	-	-	The nitrate-rich beetroot juice active treatment group showed significant improvements in the Incremental Shuttle Walk Test (ISWT) walking distance and daily step count compared to the nitrate-depleted placebo group. However, there were no differences in Medical Research Council (MRC) dyspnea scores, COPD Assessment Test (CAT), and Hospital Anxiety and Depression Scale (HADS) scores.	Beetroot juice improved vascular function.	The study showed that compared to the placebo group, the nitrate-rich beetroot juice group exhibited statistically significant reductions in systolic and diastolic blood pressure, and mean arterial pressure at the end of the intervention, with a significant antihypertensive effect that lasted at least eight weeks.	-	12.9 mmol	56
Webb AJ, et al. (2024)59	-	-	-	-	Beetroot juice could significantly increased walking distance and improved exercise capacity.	-	Beetroot juice could significantly reduce systolic blood pressure.	-	-	-
Leong, et al.(2015)60	Double-blind, computer-randomized placebo control crossover trial	19	-	-	Compared to the placebo group, the patients with COPD who consumed beetroot juice showed an 11% and 6% improvement in the average walking distance and fatigue time, respectively, in the Endurance Shuttle Walk Test (ESWT). However, these differences were not statistically significant. Moreover, no difference was observed in the dyspnea scores between the two groups.	-	The study observed a decrease in blood pressure in patients with stable moderate COPD after nitrate supplementation.	-	-	-
Kerley CP, et al.(2015)48	Randomized, placebo-controlled, double-blinded, crossover study	11	↑	↑	-	-	Beetroot juice intervention for one week significantly lowered the resting systolic and diastolic blood pressures, as well as the mean arterial pressure in patients with COPD.	-	140ml	-
Notes: No. patients, Number of patoents; None, No increase in the levels of the substance was detected in the plasma; "-" , not specified; ↑, An elevated level of the substance has been detected in the plasma.
